# Supplementary material for: Controlled Hydrolysis of Odorants Schiff Bases in Low-Molecular-Weight Gels
Source: MDPI journal article supplement (doi:10.3390/ijms23063105), 2022-03-13
Supplement: s1 [file s1]

## Supporting Information

### Controlled hydrolysis of odorants Schiff bases in low-molecular-weight gels

Gloria Nicastro <sup>1</sup>, Louise Mary Black <sup>2</sup>, Paolo Ravarino <sup>1</sup>, Simone d'Agostino <sup>1</sup>, Davide Faccio <sup>1</sup>, Claudia Tomasini <sup>1,\*</sup>, and Demetra Giuri <sup>1,\*</sup>

1 Dipartimento di Chimica Giacomo Ciamician, Università di Bologna, Via Selmi, 2, 40126 Bologna, Italy; gloria.nicastro@studio.unibo.it (G.N.); louise.black@studio.unibo.it (L.M.B.); paolo.ravarino2@unibo.it (P.R.); simone.dagostino2@unibo.it (S.D.A.); davide.faccio2@unibo.it (D.F.)

2 School of Chemistry, University of Glasgow, Glasgow G12 8QQ, UK; louise.black@studio.unibo.it

\* Correspondence: demetra.giuri2@unibo.it; claudia.tomasini@unibo.it

|                                                                                  |         |
|----------------------------------------------------------------------------------|---------|
| <b>Scheme S1.</b> Synthesis of compound <b>SB1-SB4</b>                           | S2      |
| Preparation of compounds <b>SB1-SB4</b>                                          | S3      |
| MS spectra of <b>SB1-SB4</b>                                                     | S4-S7   |
| <sup>1</sup> H NMR, <sup>13</sup> C NMR and IR spectra of <b>SB2P</b>            | S8-S9   |
| <b>Figure S1.</b> Methyl anthranilate calibration curve                          | S11     |
| Schiff base synthesis: A:MA ratio screening                                      | S12     |
| <b>Table S1.</b> Screening of the optimal A:MA ratio for each SB synthesis       | S13     |
| Schiff base synthesis: time screening                                            | S14-S15 |
| <b>Table S2.</b> Screening of the optimal time for each SB synthesis             | S16     |
| <b>Figure S2.</b> Optical microscope images of the crystals of <b>SB2P</b>       | S17     |
| <b>Table S3.</b> Crystal data and refinement details for crystalline <b>SB2P</b> | S18     |
| <b>Figure S3.</b> Ortep drawing of <b>SB2P</b>                                   | S19     |
| <b>Figure S4.</b> Calibration curve Helional Schiff base (crystallised)          | S20     |
| Hydrolysis in solution: analysis method                                          | S21     |
| <b>Table S4.</b> pH values for solutions and gels for all the SB                 | S22     |
| <b>Figure S5.</b> Photograph of <b>SB2P</b> solutions after sonication           | S23     |
| <b>Figure S6.</b> Photograph of the gels obtained with gelators A and B          | S23     |
| <b>Figure S7.</b> Amplitude sweep measurements for the gels prepared             | S24     |
| <b>Table S5.</b> Hydrolysis results for the SB under neutral conditions.         | S25     |
| <b>Table S6.</b> Hydrolysis results for the SB under acidic conditions.          | S25     |

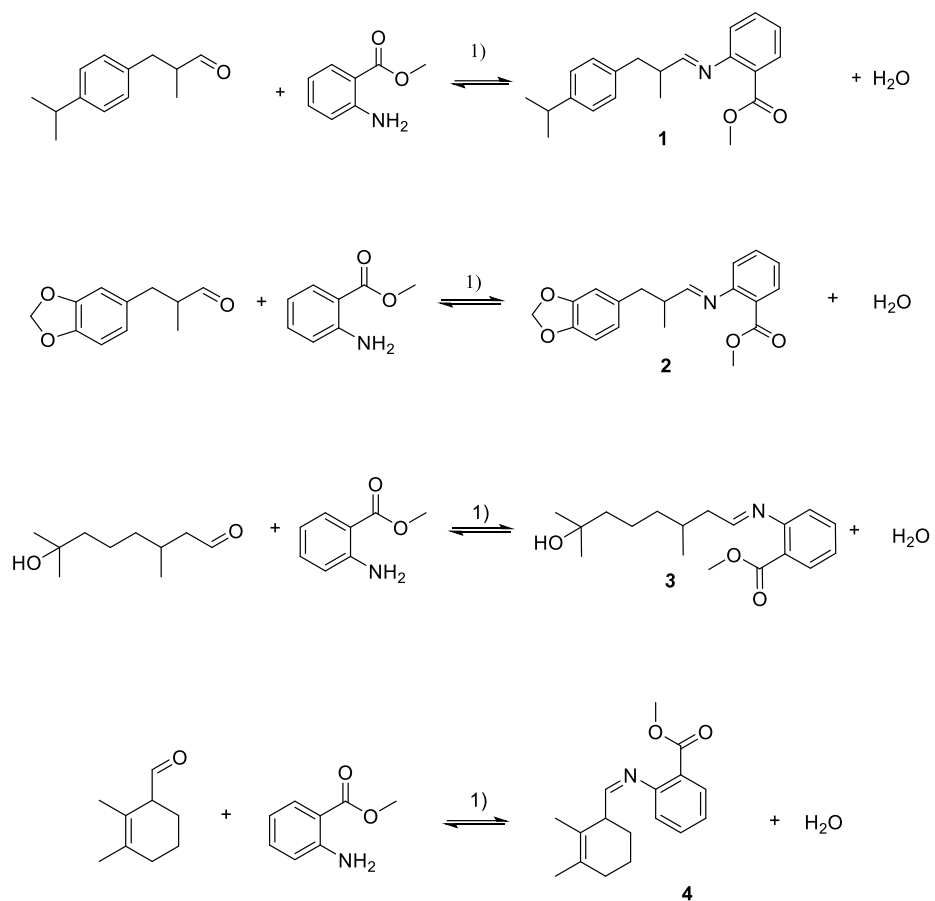

**Scheme S1.** Synthesis of compound **SB1-SB4**. Reagents and conditions: 1) T = 110 °C.

#### Preparation of compounds SB1-SB4.

**SB1.** Cyclamal aldehyde (126 mg, 0.662 mmol) and methyl anthranilate (50 mg, 0.331 mmol) were mixed in 2:1 ratio in a vial and placed in an oil bath preheated at 110 °C. The reaction mixture was stirred for 30 min. Then the crude was dissolved in EtOH and the conversion was quantified using an HPLC-MS. HPLC-MS (API-ES): 17.87 min,  $[M+H]^+=324$ .

**SB2.** Helional aldehyde (127 mg, 0.662 mmol) and methyl anthranilate (50 mg, 0.331 mmol) were mixed in 2:1 ratio in a vial and placed in an oil bath preheated at 110 °C. The reaction mixture was stirred for 30 min. Then the crude (**SB2**) was dissolved in EtOH and the conversion was quantified using an HPLC-MS. The reaction was also repeated on 2.60 mmol of aldehyde (1.30 mmol of MA) and the crude was dissolved in methanol (10 mL), heated until completely solubilization and left to crystallise overnight. The crystals (**SB2P**) were then filtered and washed several times with cold methanol (yield: 22.4%).

**SB2P.** HPLC-MS (API-ES): 11.68 min,  $[M+H]^+=326$ . M.p. = 82-84°C; IR-ATR:  $\nu$  = 3302, 3261, 1658, 1606, 1584, 1520, 1483, 1435  $\text{cm}^{-1}$ ;  $^1\text{H}$  NMR ( $\text{CDCl}_3$ , 400MHz)  $\delta$ : 1.67 (3H, d,  $J=1.6$  Hz, C- $\text{CH}_3$ ), 3.28 (2H, bs, Ar- $\text{CH}_2$ ), 3.87 (3H, s, O- $\text{CH}_3$ ), 5.91 (2H, s, O- $\text{CH}_2$ -O), 6.38 (2H, dd,  $J=1.2$ , 10.4 Hz, Ar-CH), 6.69 (4H, m, Ar-CH), 6.91 (1H, dd,  $J=1.2$ , 8.8 Hz, Ar-CH), 7.36 (1H, m, Ar-CH), 7.91 (1H, dd,  $J=1.6$ , 8.0 Hz, Ar-CH), 9.51 (1H,  $J=10.4$  Hz, CH=N);  $^{13}\text{C}$ -NMR ( $\text{CDCl}_3$ )  $\delta$ : 14.50, 42.80, 51.68, 100.75, 107.98, 109.08, 110.23, 111.66, 115.42, 116.08, 121.14, 121.53, 131.66, 134.20, 134.63, 145.81, 146.75, 147.58, 169.05.

**SB3.** Hydroxy citronellal aldehyde (57 mg, 0.331 mmol) and methyl anthranilate (100 mg, 0.662 mmol) were mixed in 1:2 ratio in a vial and placed in an oil bath preheated at 110 °C. The reaction mixture was stirred for 120 min. Then the crude was dissolved in EtOH and the conversion was quantified using an HPLC-MS. HPLC-MS (API-ES): 10.43 min,  $[M+H]^+=306$ .

**SB4.** Triplal aldehyde (91.5 mg, 0.662 mmol) and methyl anthranilate (50 mg, 0.331 mmol) were mixed in 2:1 ratio in a vial and placed in an oil bath preheated at 110 °C. The reaction mixture was stirred for 60 min. Then the crude was dissolved in EtOH and the conversion was quantified using an HPLC-MS. HPLC-MS (API-ES): 14.65 min,  $[M+H]^+=272$ .

MS of compound **SB1**.

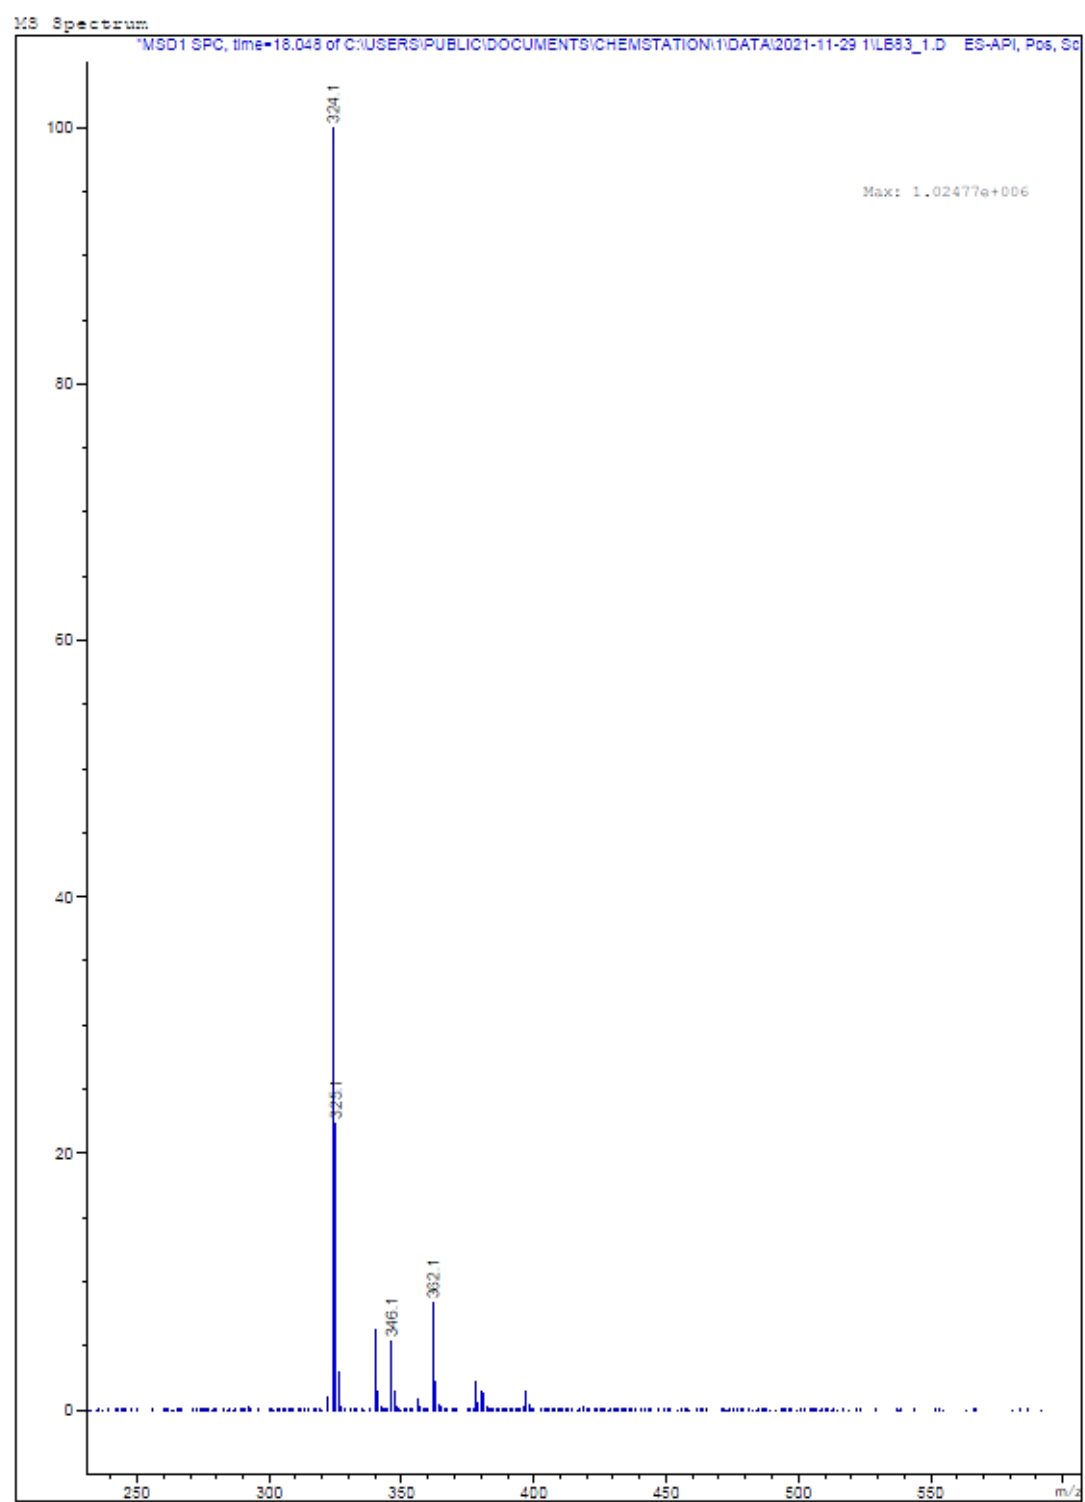

# MS of SB2

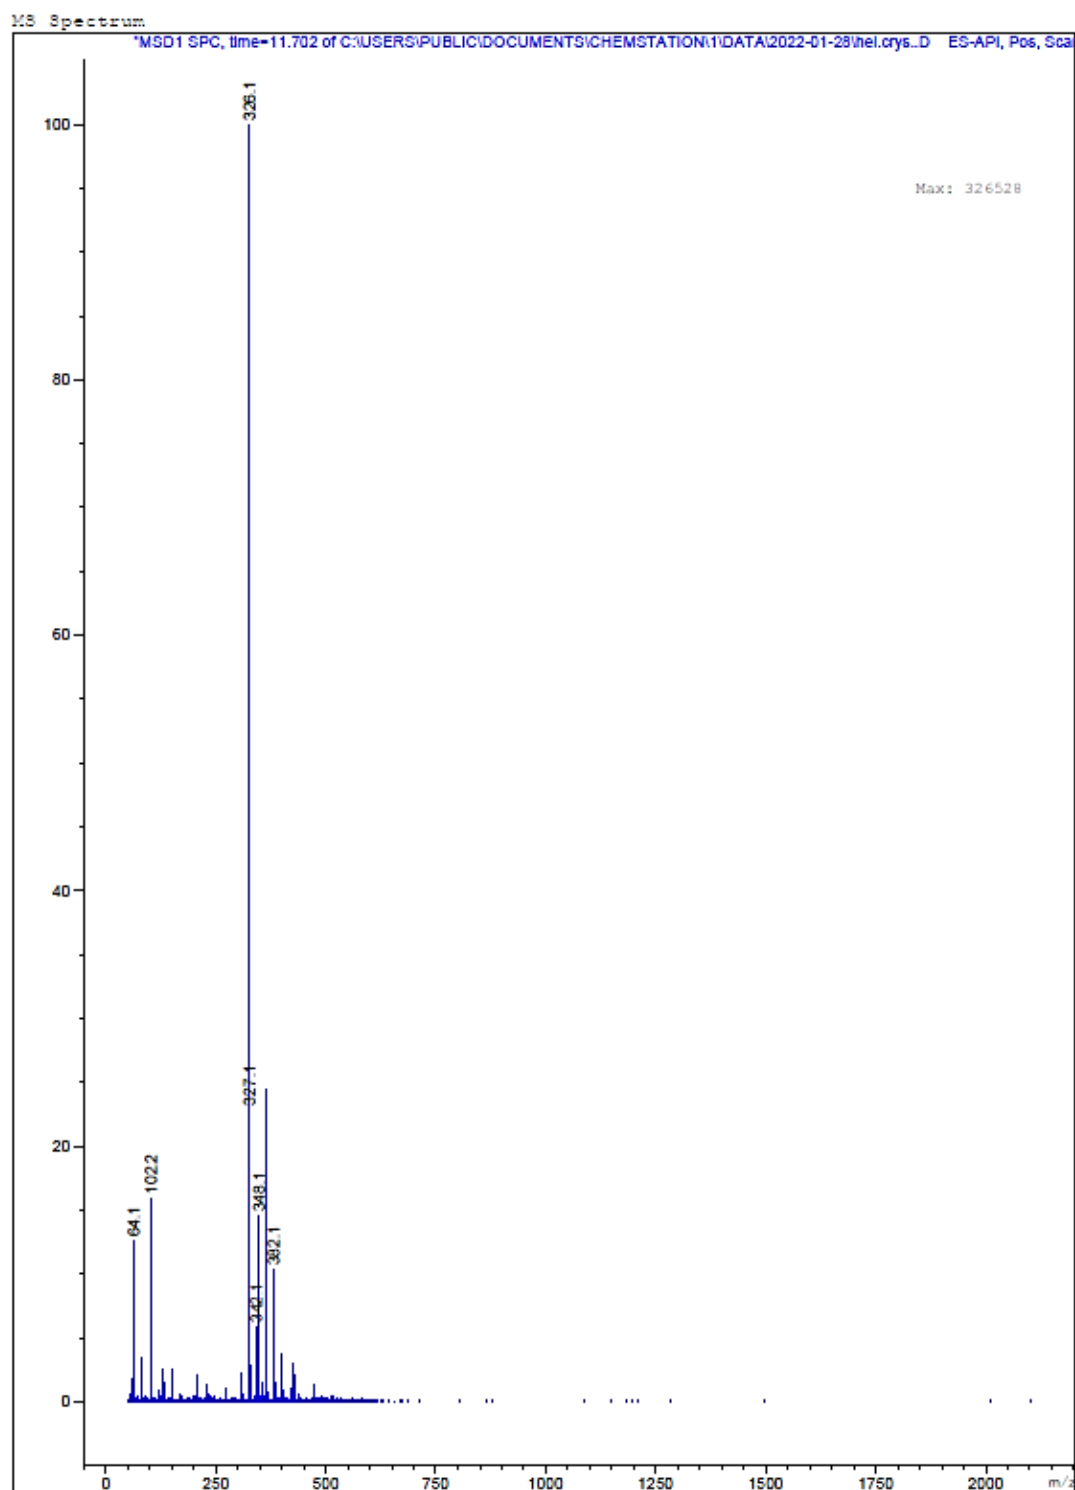

# MS of compound **SB3**

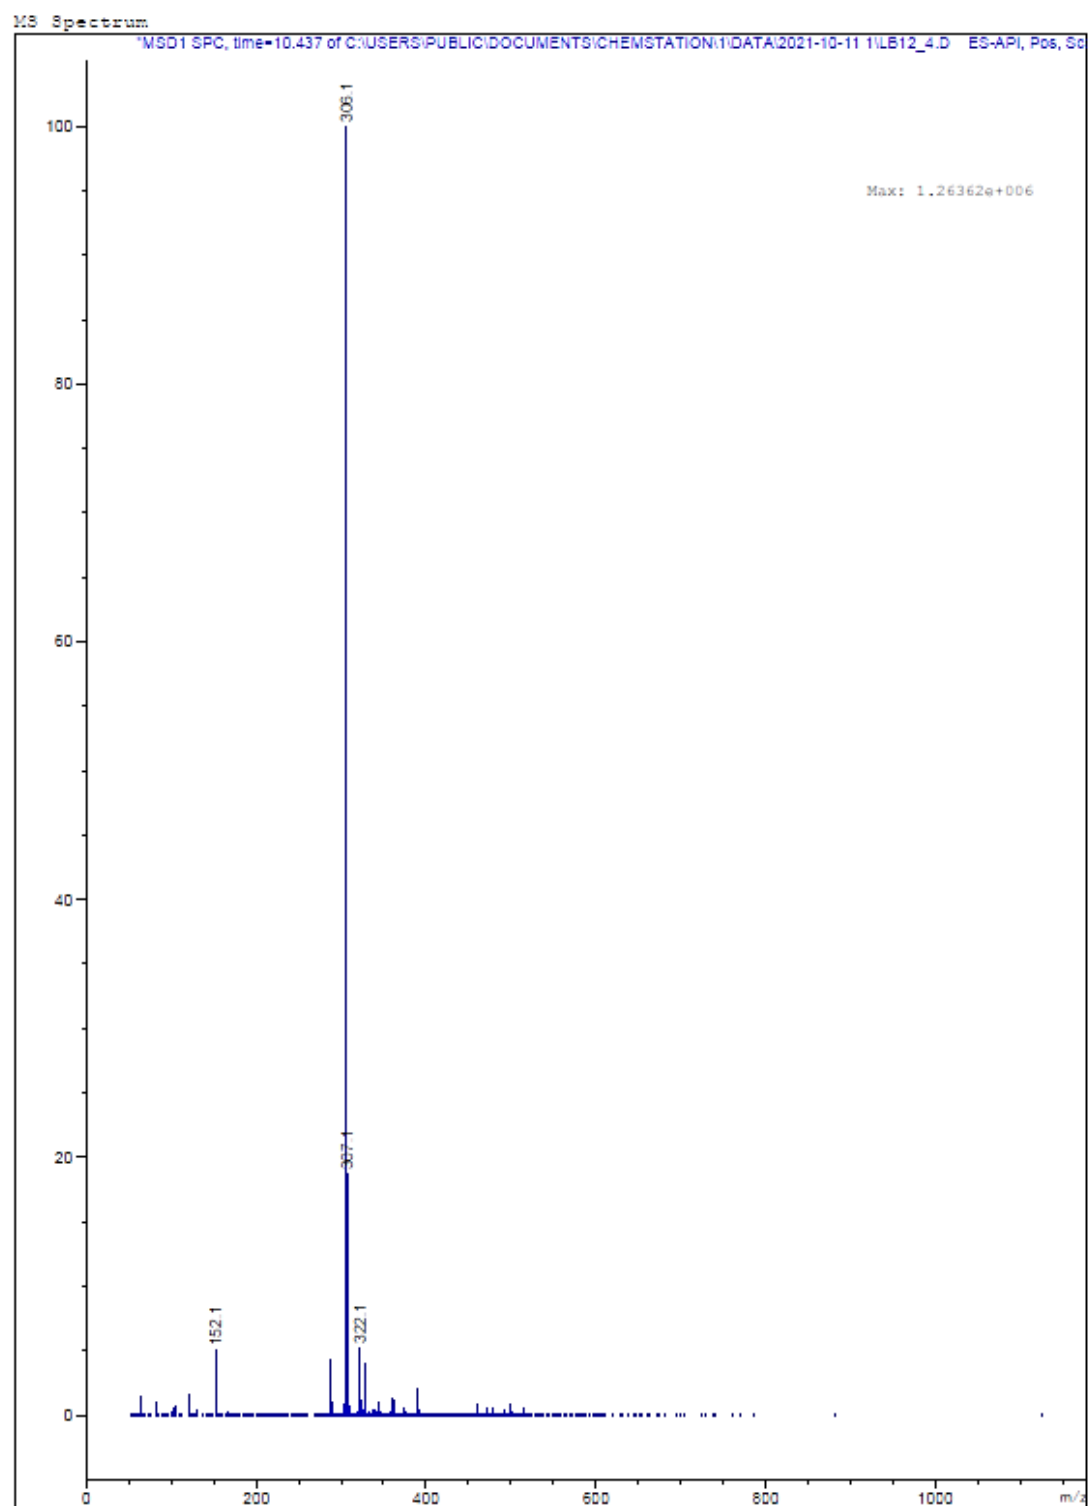

# MS of compound **SB4**

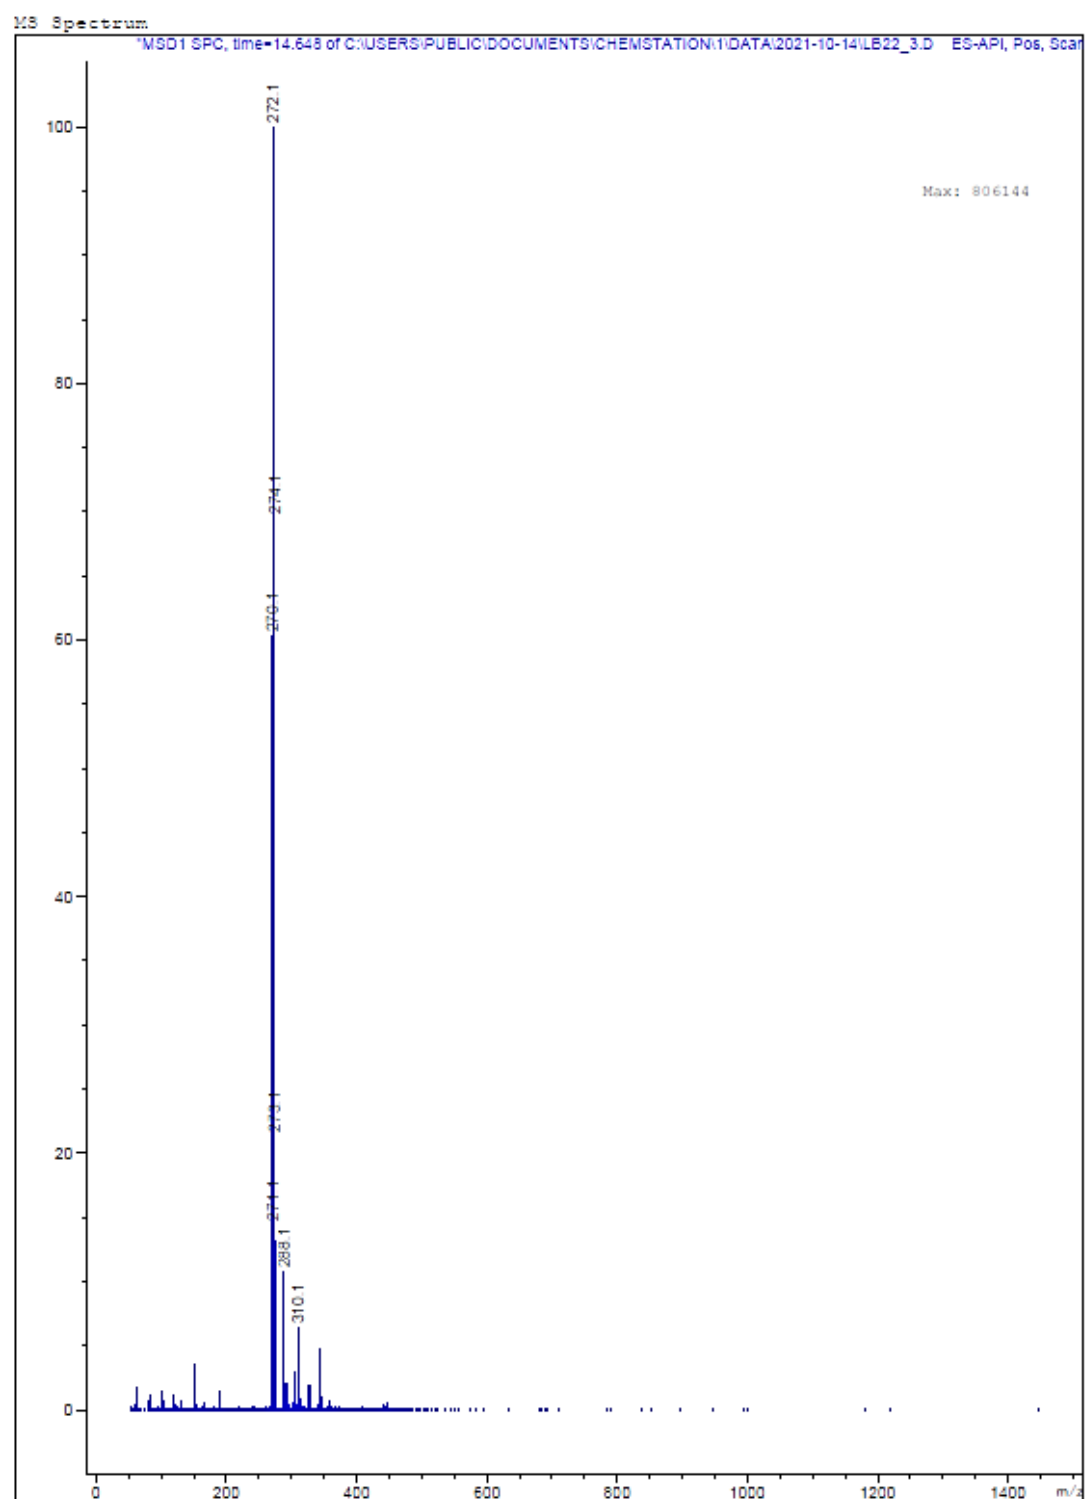

<sup>1</sup>H-NMR spectrum of compound **SB2P**

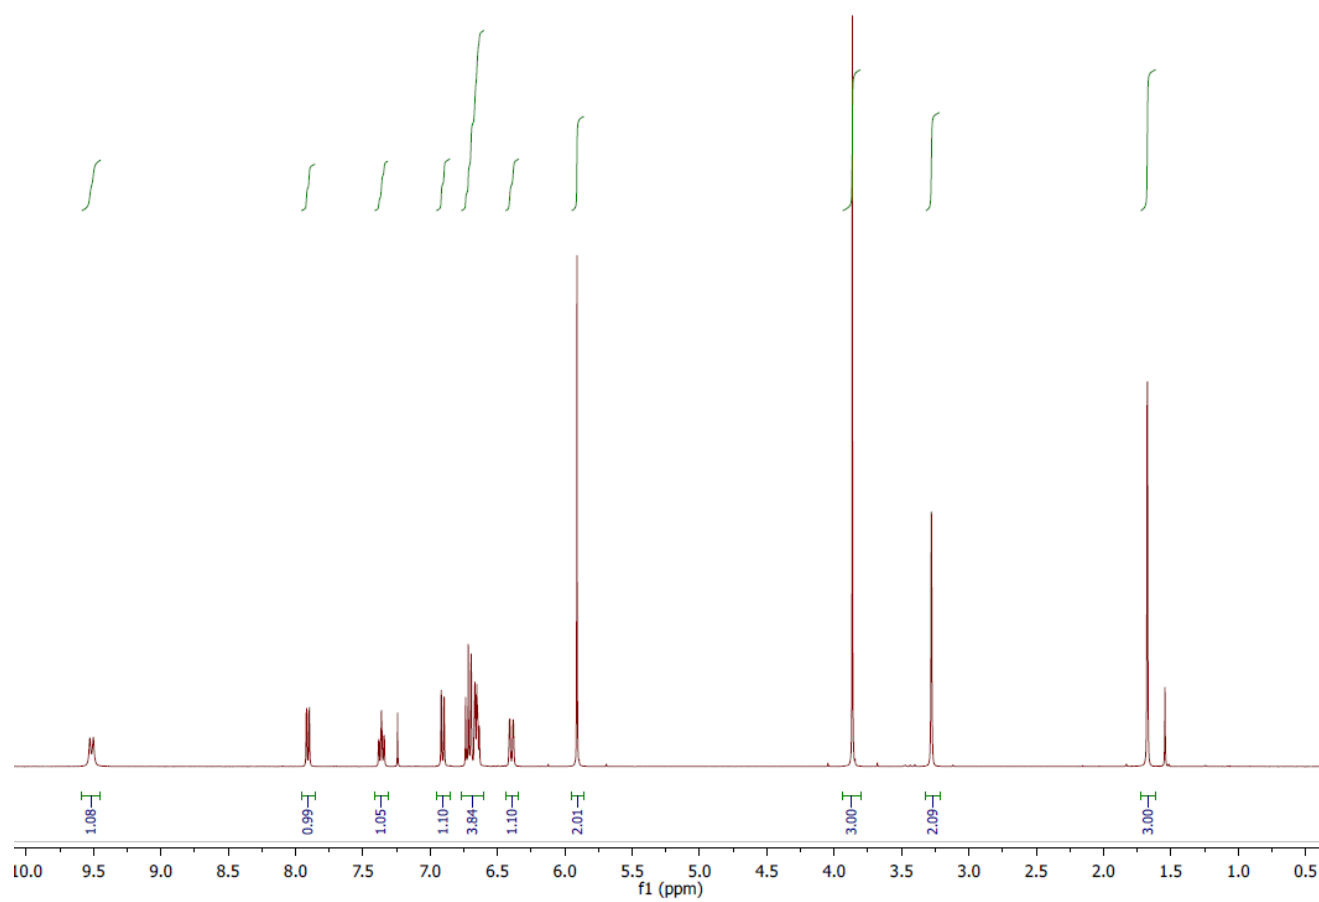

$^{13}\text{C}$  NMR spectrum of compound **SB2P**

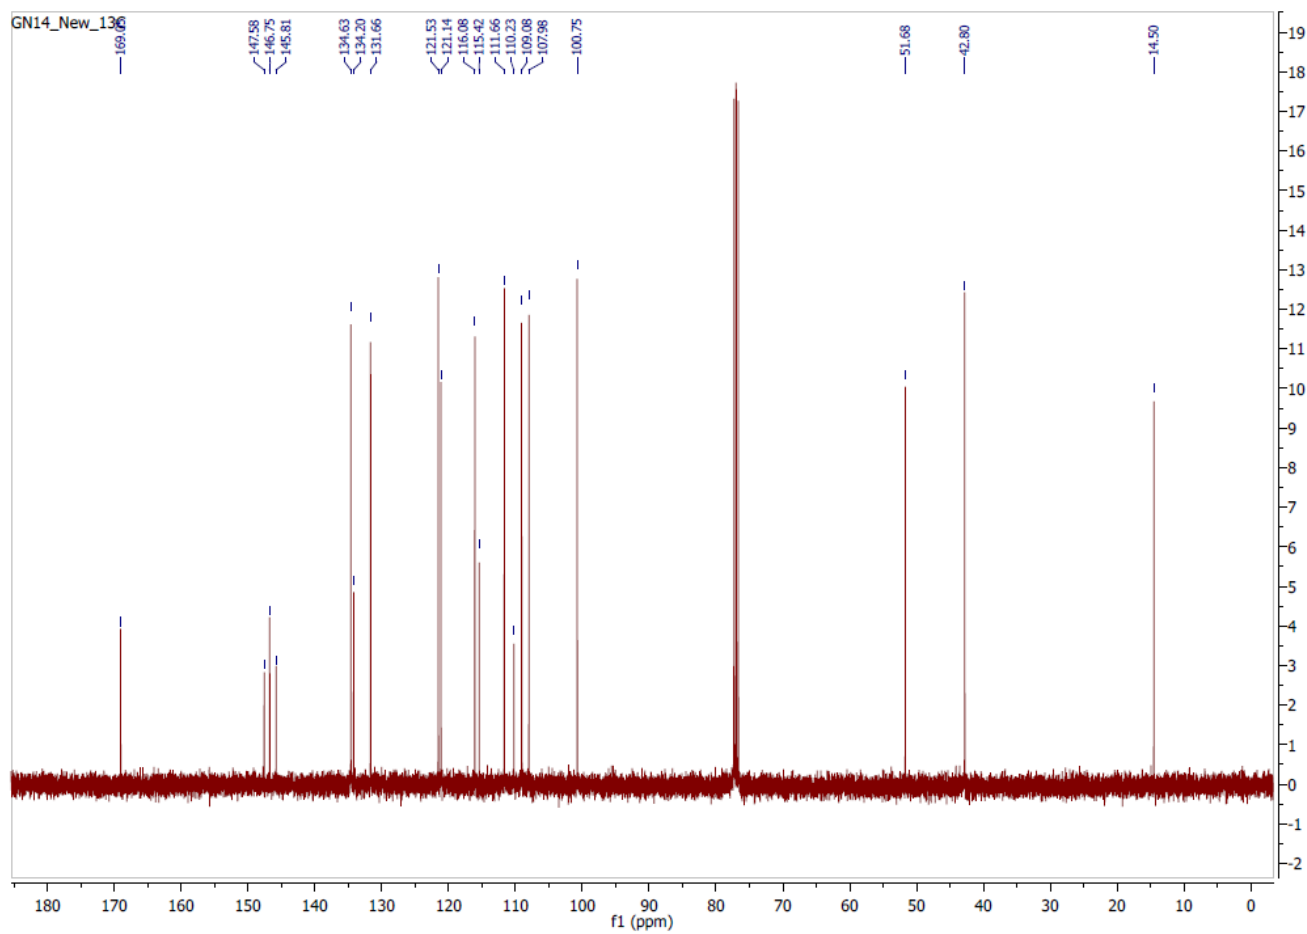

IR spectrum of compound **SB2P**

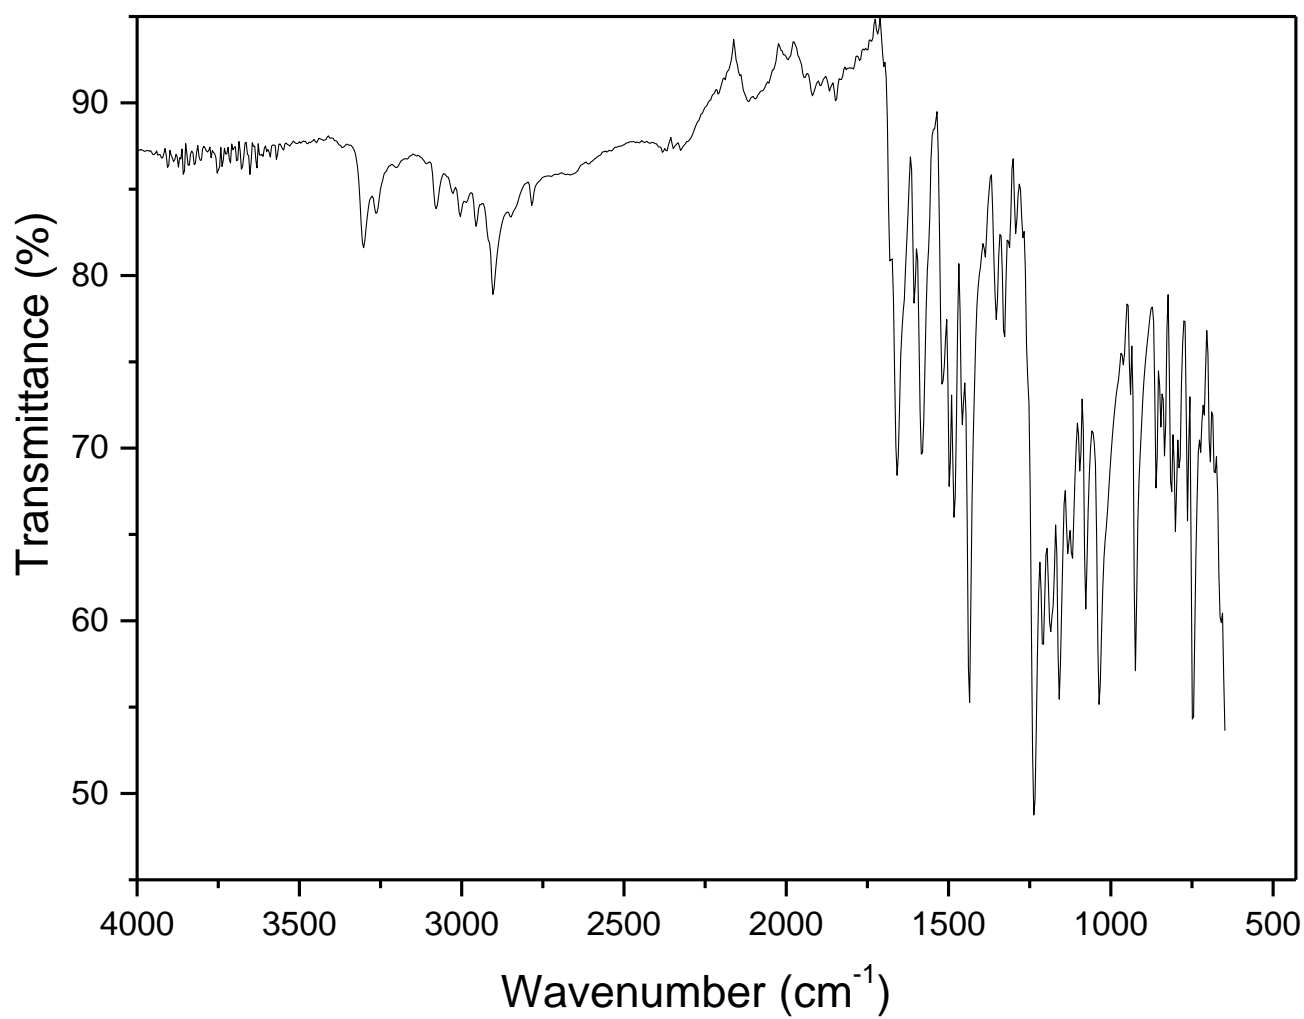

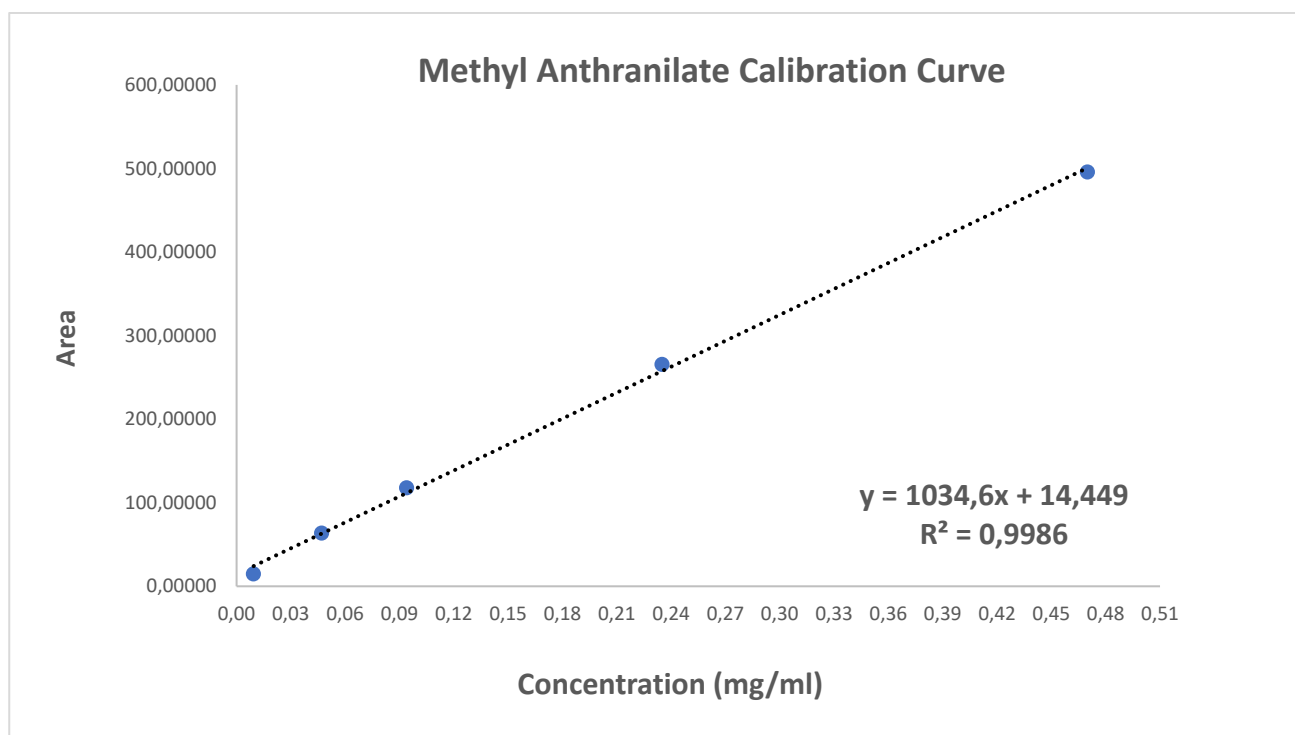

**Figure S1.** Methyl anthranilate calibration curve.

The calibration curve was built starting from a solution of methyl anthranilate (9.4 mg) in acetonitrile (10 mL). All the dilutions of this mother solution were injected in a HPLC-MS (DAD = 280 nm).

| Concentration (mg/ml) | Area      |
|-----------------------|-----------|
| 0,0094                | 14,64658  |
| 0,0470                | 63,64524  |
| 0,0940                | 117,77985 |
| 0,2350                | 265,48605 |
| 0,4700                | 495,65579 |

### Schiff base synthesis: A:MA ratio screening

The Schiff bases (SB) were prepared by mixing methyl anthranilate (MA) and aldehyde (A) at different equivalence ratio A:MA. Then, the mixture was placed in a preheated oil bath at 110 °C and continuously stirred using the magnetic stirrer. After 1 h, the entire contents of the vial were dissolved in a 5 ml standard flask using ethanol. This was diluted by dissolving 100 µl of this solution into a 3 ml standard flask using ACN. A HPLC-MS sample was taken from the ACN solution.

#### Method 1.

The concentration of unreacted MA after 1 h is determined from the calibration curve and, taking into account the dilution factor, the mg of unreacted MA were calculated. Assuming that all the MA consumed is converted into SB, the quantity of unreacted MA was subtracted from the initial mass of MA, obtaining the mass of reacted MA and the conversion as follows.

$hx_0$  = quantity of MA at the beginning of the reaction (in mmol)

$x_1$  = quantity of MA at the end of the reaction (in mmol)

$x$  = quantity of SB at the end of the reaction (in mmol)

$$x = hx_0 - x_1$$

The constant h has known values and according to the ratio between MA and A it can be:

- 1, if the MA is the limiting reagent
- 2, if the quantity of MA used is the double of the limiting reagent

$$\text{Conversion (\%)} = \frac{hx_0 - x_1}{x_0} \times 100$$

**Table S1.** Screening of the optimal A:MA ratio for each SB synthesis

| Schiff base | Aldehyde  | Ratio A:MA | Time (min) | Conversion (%) |
|-------------|-----------|------------|------------|----------------|
| <b>1</b>    | <b>A1</b> | <b>2:1</b> | <b>60</b>  | <b>93.28</b>   |
| 1           | A1        | 1:1        | 60         | 63.77          |
| 1           | A1        | 1:2        | 60         | 77.31          |
| <b>2</b>    | <b>A2</b> | <b>2:1</b> | <b>60</b>  | <b>95.13</b>   |
| 2           | A2        | 1:1        | 60         | 82.38          |
| 2           | A2        | 1:2        | 60         | 70.23          |
| 3           | A3        | 2:1        | 60         | 17.56          |
| 3           | A3        | 1:1        | 60         | 21.61          |
| <b>3</b>    | <b>A3</b> | <b>1:2</b> | <b>60</b>  | <b>79.46</b>   |
| <b>4</b>    | <b>A4</b> | <b>2:1</b> | <b>60</b>  | <b>81.73</b>   |
| 4           | A4        | 1:1        | 60         | 44.72          |
| 4           | A4        | 1:2        | 60         | 75.98          |

## Schiff base synthesis: time screening

To study the optimal time for each Schiff base synthesis, MA and A were mixed at the correct equivalence ratio. Then, placed in a preheated oil bath at  $110\text{ }^{\circ}\text{C} \pm 5$  and continuously stirred using the magnetic stirrer. A HPLC-MS sample was taken and weighed at the various time intervals, and then diluted into 1 ml of acetonitrile (ACN). A methyl anthranilate calibration curve was constructed to allow the determination of its concentration (mg/ml) left after the reaction. The area of the methyl anthranilate peak from the 280 nm signal was used in the calibration curve equation.

### Method 2.

Taking  $N$  mg of mixture at the first withdrawal  $t_1$  it is possible to know the amount of MA left in the mixture from the calibration curve.

If the same amount  $N$  was withdrawn at the time  $t_0$ , it would have been composed as follow.

#### Case 1: the ratio A:MA is 1:2

$$X_A + Y_{MA} = N$$

Where  $X_A$  and  $Y_{MA}$  are the masses of aldehyde and methyl anthranilate respectively and can be expressed as product of the quantity of matter and the molecular weight of each one.

$$x_0 MW_A + 2x_0 MW_{MA} = N$$

Where  $x_0$  is the quantity of matter of the limiting reagent inside the mixture at time  $t_0$  expressed in mmol. Therefore:

$$x_0 = \frac{N}{MW_A + 2MW_{MA}}$$

The time at which the withdrawal was taken is called  $t_1$ . The amount of SB produced at time  $t_1$  is called  $x$  and can be obtained from the calibration curve of MA, assuming that all the MA consumed is converted into SB. The amount of MA left at time  $t_1$  is called  $x_1$ , therefore:

$$x = 2x_0 - x_1$$

$$\text{Conversion (\%)} = \frac{2x_0 - x_1}{x_0} \times 100$$

#### Case 2: the ratio A:MA is 2:1

$$2x_0 MW_A + x_0 MW_{MA} = N$$

And therefore:

$$x_0 = \frac{N}{2MW_A + MW_{MA}}$$

quantity of SB  $x = x_0 - x_1$

$$\textbf{Conversion} (\%) = \frac{x_0 - x_1}{x_0} \times \mathbf{100}$$

**Case 3: the ratio A:MA is 1:1**

$$x_0 MW_A + x_0 MW_{MA} = N$$

And therefore:

$$x_0 = \frac{N}{MW_A + MW_{MA}}$$

quantity of SB  $x = x_0 - x_1$

$$\textbf{Conversion} (\%) = \frac{x_0 - x_1}{x_0} \times \mathbf{100}$$

**Table S2.** Screening of the optimal time for each SB synthesis, using the A:MA ratio selected.

| Schiff base | Aldehyde  | Ratio A:MA | Time (min) | Conversion (%) |
|-------------|-----------|------------|------------|----------------|
| <b>1</b>    | <b>A1</b> | <b>2:1</b> | <b>30</b>  | <b>93.28</b>   |
| 1           | A1        | 2:1        | 60         | 79.89          |
| 1           | A1        | 2:1        | 120        | 82.50          |
| <b>2</b>    | <b>A2</b> | <b>2:1</b> | <b>30</b>  | <b>97.76</b>   |
| 2           | A2        | 2:1        | 60         | 95.13          |
| 2           | A2        | 2:1        | 120        | 97.17          |
| <b>3</b>    | <b>A3</b> | <b>1:2</b> | <b>30</b>  | <b>45.55</b>   |
| 3           | A3        | 1:2        | 60         | 79.46          |
| <b>3</b>    | <b>A3</b> | <b>1:2</b> | <b>120</b> | <b>82.04</b>   |
| <b>4</b>    | <b>A4</b> | <b>2:1</b> | <b>30</b>  | <b>71.62</b>   |
| <b>4</b>    | <b>A4</b> | <b>2:1</b> | <b>60</b>  | <b>81.73</b>   |
| 4           | A4        | 2:1        | 120        | 81.97          |

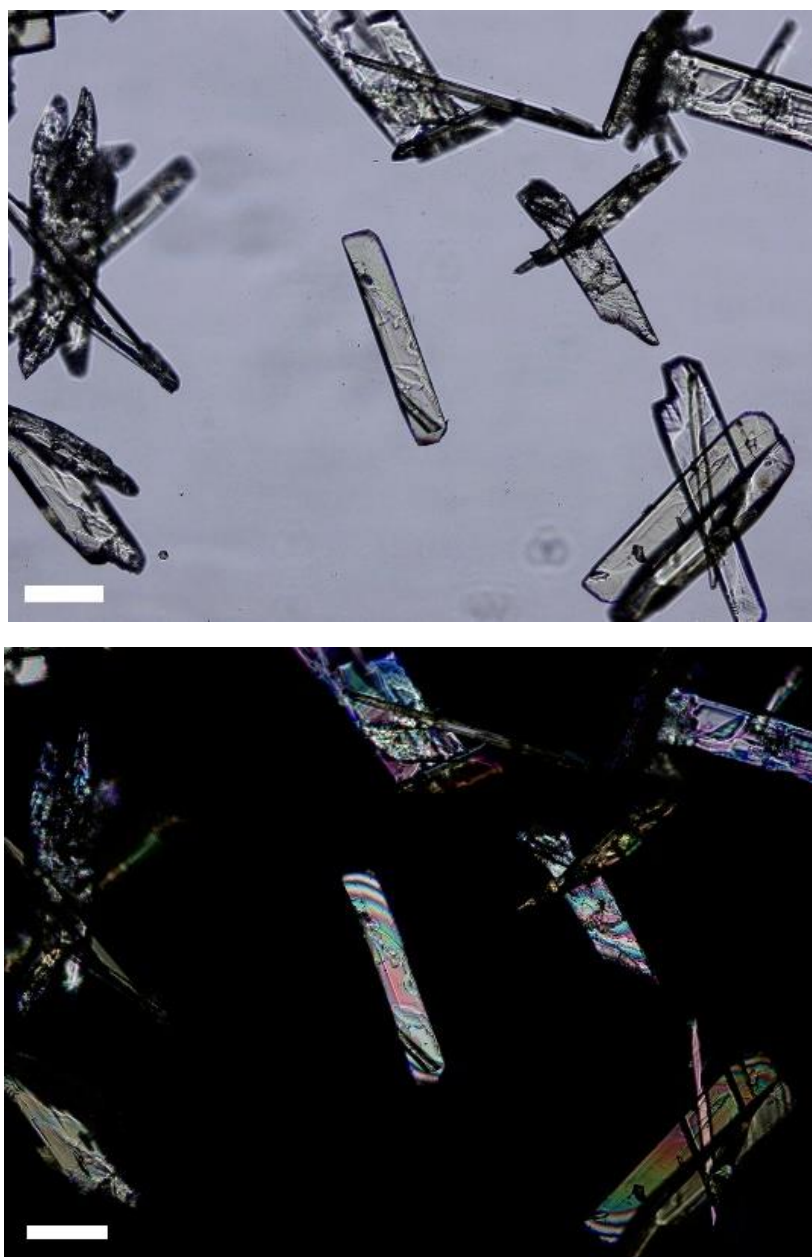

**Figure S2.** Optical microscope images of the crystals of **SB2P** (polarized light on the bottom). Scalebar is 100  $\mu\text{m}$ .

**Table S3.** Crystal data and refinement details for crystalline **SB2**.

|                                                                | <b>SB2</b>                                      |
|----------------------------------------------------------------|-------------------------------------------------|
| <b>Formula</b>                                                 | C <sub>19</sub> H <sub>19</sub> NO <sub>4</sub> |
| <b>FW</b>                                                      | 325.35                                          |
| <b>Temperature</b>                                             | 295                                             |
| <b>Cryst. System</b>                                           | triclinic                                       |
| <b>Space group</b>                                             | P-1                                             |
| <b>Z</b>                                                       | 2                                               |
| <b>a (Å)</b>                                                   | 4.9432(5)                                       |
| <b>b (Å)</b>                                                   | 13.7751(15)                                     |
| <b>c (Å)</b>                                                   | 13.8426(17)                                     |
| <b>α (deg)</b>                                                 | 117.355(12)                                     |
| <b>β (deg)</b>                                                 | 92.373(9)                                       |
| <b>γ (deg)</b>                                                 | 93.130(8)                                       |
| <b>V (Å<sup>3</sup>)</b>                                       | 833.58(18)                                      |
| <b>D<sub>calc</sub> (g/cm<sup>3</sup>)</b>                     | 1.296                                           |
| <b>μ (mm<sup>-1</sup>)</b>                                     | 0.091                                           |
| <b>Measd reflns</b>                                            | 5491                                            |
| <b>Indep reflns</b>                                            | 2929                                            |
| <b>Largest diff. peak/hole (e/Å<sup>3</sup>)</b>               | 0.13/-0.15                                      |
| <b>R<sub>1</sub>[on F<sub>o</sub><sup>2</sup>, I&gt;2σ(I)]</b> | 0.0493                                          |
| <b>wR<sub>2</sub> (all data)</b>                               | 0.1218                                          |

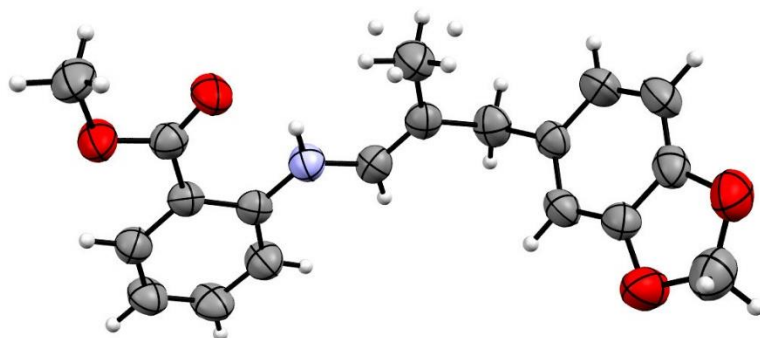

**Figure S3.** Ortep drawing of **SB2** (ellipsoids drawn at 50% probability).

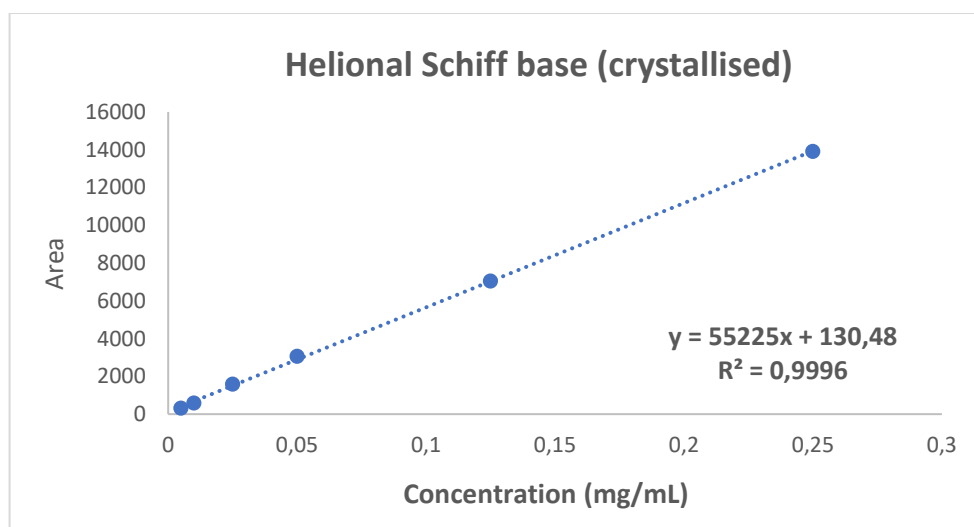

**Figure S4.** Calibration curve Helional Schiff base (crystallised).

The calibration curve was built starting from a solution of helional Schiff base crystals in ethanol. All the dilutions of this mother solution were injected in a HPLC-MS (DAD = 210 nm).

| Concentration | Area       |
|---------------|------------|
| 0,005         | 307,91562  |
| 0,01          | 580,49304  |
| 0,025         | 1577,84839 |
| 0,05          | 3059,14771 |
| 0,125         | 7035,26367 |
| 0,25          | 13901,7    |

### Hydrolysis study in solution

After the reaction has undergone the optimum time for the specific Schiff base synthesis, the crude was dissolved in a 10 ml volumetric flask with the desired ratio of EtOH/H<sub>2</sub>O. The concentration of unreacted MA at *t*<sub>0</sub> was determined from the calibration curve and, taking into account the dilution factor, the mg of unreacted MA were calculated. This quantity was subtracted from the initial mass of MA added for the reaction, obtaining the mass (and the moles) of reacted MA, and thus the starting moles of SB.

**mmol of reacted MA = mmol of SB produced**

$$\text{Conversion (\%)} = \frac{\text{mmol of SB}}{\text{mmol of limiting reagent}} \times 100$$

The hydrolysis of SB at each time (*t*<sub>x</sub>) was calculated as:

$$\text{Hydrolysis (\%)} = \frac{\text{mmol of SB at } t_0 - \text{mmol of SB at } t_x}{\text{mmol of SB at } t_0} \times 100$$

### Hydrolysis study in gel (A or B)

The starting moles of SB were calculated right after the synthesis of each SB dissolving all the crude in EtOH and using the equations described in [Method 1](#). The volume of the EtOH solution required to add 0.5% w/V concentration of SB (5 mg/mL) in each gel is calculated and added to the gelator solution as described in the Materials and Methods section.

At specific time intervals, each gel sample was completely dissolved in 1 mL of ACN, and to prepare the HPLC sample 200 µl of this solution were withdrawn and diluted to 1 ml of ACN. Considering the dilution factor, the hydrolysis calculation were done in the same way described above for the solutions.

**Table S4.** pH values for solutions and gels for all the SB

| <b>Media</b>      | <b>Time (h)</b> | <b>SB1</b> | <b>SB2</b> | <b>SB2P</b> | <b>SB3</b> | <b>SB4</b> |
|-------------------|-----------------|------------|------------|-------------|------------|------------|
| Sol. 85:15        | 0               | 5.92       | 5.71       | 4.81        | 5.66       | 5.93       |
| Sol. 85:15        | 24              | 5.97       | 5.77       | 4.80        | 6.66       | 5.98       |
| Sol. 70:30        | 0               | 5.03       | 5.14       | 4.83        | 5.27       | 5.69       |
| Sol. 70:30        | 24              | 5.08       | 5.65       | 5.01        | 5.21       | 5.76       |
| Sol. 70:30 + acid | 0               | 3.55       | 3.62       | 3.60        | 3.57       | 3.74       |
| Sol. 70:30 + acid | 24              | 3.47       | 3.64       | 3.64        | 3.58       | 3.63       |
| Gel A             | 0               | 5.62       | 5.19       | 6.58        | 5.55       | 5.78       |
| Gel A             | 24              | 5.57       | 5.26       | 5.52        | 5.25       | 5.81       |
| Gel B             | 0               | 3.86       | 4.10       | 3.81        | 3.75       | 4.04       |
| Gel B             | 24              | 4.07       | 3.95       | 4.03        | 4.27       | 4.01       |

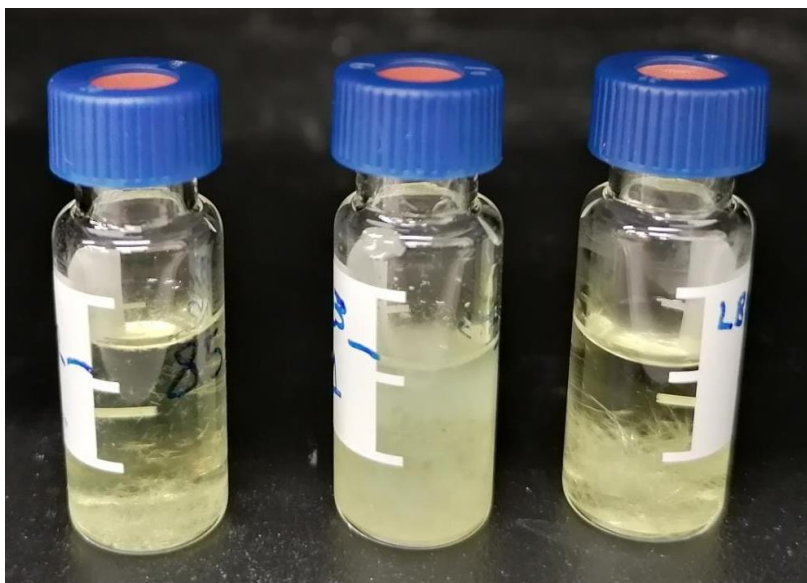

**Figure S5.** Photograph of **SB2P** solutions. From left to right: solution 85:15, solution 70:30, solution 70:30 and acetic acid.

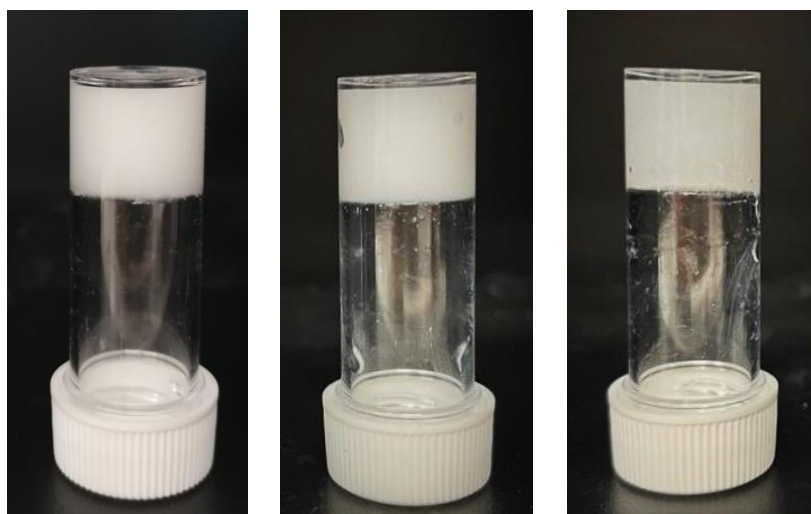

**Figure S6.** Photograph of the gels obtained with gelators **A** and **B**. From left to right: gelator **A** in 85:15 solvent ratio; gelator **A** in 70:30 solvent ratio; gelator **B** in 70:30 solvent ratio.

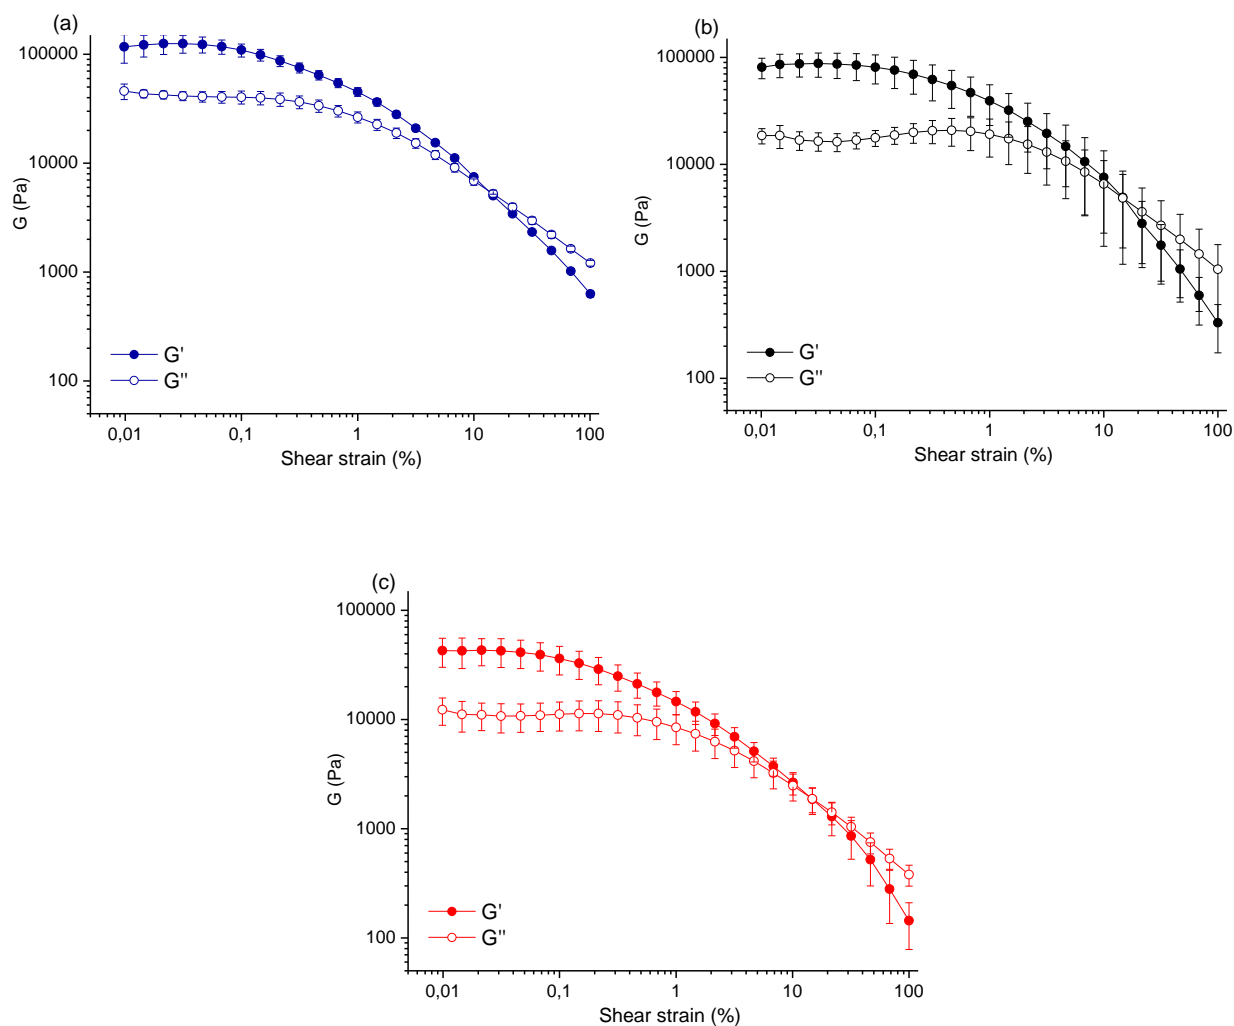

**Figure S7.** Amplitude sweep measurements for the gels prepared. (a) Gelator A (85:15); (b) gelator A (70:30), (c) gelator B (70:30). All measurements were repeated three times (mean and standard deviation values shown in the graph).

**Table S5.** Hydrolysis results for the SB under neutral conditions (mean values and standard deviations).

| Time (h) | Conversion in ethanol/water solution (%) |                |                |                |                | Conversion in gel obtained from gelator A (%) |               |                |                |               |
|----------|------------------------------------------|----------------|----------------|----------------|----------------|-----------------------------------------------|---------------|----------------|----------------|---------------|
|          | SB1                                      | SB2            | SB2P           | SB3            | SB4            | SB1                                           | SB2           | SB2P           | SB3            | SB4           |
| 24       | 3.20±<br>1.10                            | 5.55±<br>3.76  | 28.18±<br>7.00 | 40.14±<br>6.72 | 10.23±<br>6.47 | 0.25±<br>0.38                                 | 1.33±<br>0.77 | 30.13±<br>8.32 | 32.10±<br>5.60 | 5.33±<br>3.67 |
| 96       | 16.83±<br>7.08                           | 11.28±<br>4.52 | 28.64±<br>2.05 | 42.77±<br>3.91 | 28.18±<br>7.01 | 6.92±<br>2.05                                 | 11.56±<br>6.9 | 34.18±<br>4.4  | 63.02±<br>6.65 | 9.68±<br>0.36 |

**Table S6.** Hydrolysis results for the SB under acidic conditions (mean values and standard deviations).

| Time (h) | Conversion in ethanol/water solution (%) |                |                 |                |                | Conversion in gel obtained from gelator B (%) |                |                |                 |                |
|----------|------------------------------------------|----------------|-----------------|----------------|----------------|-----------------------------------------------|----------------|----------------|-----------------|----------------|
|          | SB1                                      | SB2            | SB2P            | SB3            | SB4            | SB1                                           | SB2            | SB2P           | SB3             | SB4            |
| 3        | 38.00±<br>2.10                           | 44.58±<br>4.71 | 38.67±<br>13.59 | 70.36±<br>5.79 | 74.18±<br>3.02 | 23.44±<br>3.51                                | 7.90±<br>2.55  | 33.77±<br>6.60 | 54.02±<br>15.09 | 45.83±<br>3.12 |
| 24       | 91.49±<br>4.34                           | 74.91±<br>2.86 | 43.49±<br>8.83  | 72.73±<br>4.41 | 92.41±<br>1.19 | 67.57±<br>4.04                                | 70.25±<br>2.70 | 49.36±<br>9.36 | 73.58±<br>4.21  | 84.77±<br>6.06 |
| 96       | 93.10±<br>1.86                           | 95.25±<br>0.37 | 88.21±<br>9.73  | 89.17±<br>9.36 | 93.94±<br>2.1  | 82.95±<br>6.15                                | 87.72±<br>3.70 | 61.80±<br>7.95 | 89.02±<br>4.69  | 85.33±<br>4.87 |
